# Supplementary material for: Susceptibility loci revealed for bovine respiratory disease complex in pre-weaned holstein calves
Source: PubMed Central journal article supplement (PMC4445561; doi:10.1186/1471-2164-15-1164), 2014-12-22
Supplement: 12864_2014_7079_MOESM1_ESM.pdf [file 12864_2014_7079_MOESM1_ESM.pdf]

## Supplementary Information

1  
2  
3  
4  
5  
6  
7  
8  
9  
10  
11  
12  
13  
14  
15  
16  
17  
18  
19  
20  
21

### Study Animals

The California (CA) population consisted of 2,021 Holstein calves. Seven calves were removed due to discrepancies in phenotypes leaving 2,014 calves enrolled as cases (n = 1,003) and controls (n = 1,011), with 1,257 males and 757 females. The calf facility housed 80,000 animals, and all Holstein calves were obtained from dairies in the Central Valley of CA, either for custom heifer raising, or to raise as steers for sale to feedlots. All CA calves were raised in individual hutches that allowed casual contact between adjacent calves, with production rows consisting of 480 individual hutches. New arrivals ranged in age (i.e., from 24 to 48 hours old), and were placed in sanitized hutches. Ranch personnel assessed all new arrivals for failure of passive transfer by evaluating serum total proteins with a refractometer. Husbandry of the calves at the facility included feeding of milk replacer twice daily, with grain and water provided *ad libitum*. Newly arrived calves were vaccinated intranasally against infectious bovine rhinotracheitis (IBR) as well as bovine parainfluenza virus 3 (PI3), and at 8 days of age, were also given a 5-way modified-live parenteral vaccine consisting of IBR, bovine viral diarrhea virus 1 and 2 (BVDV), PI3, and bovine respiratory syncytial virus (BRSV). *Moraxella bovis* bacterin was given at 65 days of age. Weaning occurred between 60 to 75 days of age before transition to group pens, based on capacity and new animal influx at the ranch.

The overall range and frequency distribution of the McGuirk (2008) [6] health scores observed for the CA calves are provided in **Supplementary Table 1**. The mean health score for controls

22 was 1.1, with a standard deviation of 0.81 ( $\pm 0.81$ ), and was  $6.6 \pm 1.36$  for BRDC cases.  
23 Moreover, almost 94% of the control calves had a health score of 2 or less, whereas 77% of the  
24 cases had scores between 5 and 8. Of the control animals that eventually converted to a case,  
25 the mean health score as controls was  $1.3 \pm 1.01$ , which was similar to the mean of all controls  
26 ( $P = 0.35$ ). The mean health scores of the male cases was  $6.52 \pm 1.37$ , which was similar to the  
27 health scores for female cases ( $6.6 \pm 1.34$ ,  $P = 0.27$ ). In contrast, the mean health score of the  
28 male controls was lower ( $1.06 \pm 0.82$ ,) than for the female controls ( $1.2 \pm 0.8$ ,  $P = 0.0035$ ).

29 The mean age of the CA Holstein BRDC cases at diagnosis was  $46.4 \pm 8.5$  days, which was very  
30 similar to that of the controls ( $47.9 \pm 8.5$  days). The mean age of the cases and controls at  
31 sampling differed ( $P = 0.0001$ ) for the CA calves. The mean age of the male cases was  $45.9 \pm 8.0$   
32 days, which differed ( $P = 0.03$ ) from the mean age of the female cases ( $47.1 \pm 9.1$ ). Among  
33 controls, the mean age of males ( $47.9 \pm 8.4$  days) did not differ ( $P = 0.96$ ) from females ( $47.8 \pm$   
34  $8.7$  days). Likewise, there was no difference ( $P = 0.10$ ) in the proportion of cases among males  
35 ( $48.37\%$ ) and females ( $52.18\%$ ).

36 All of the NM calves were recorded as being anatomically female and were housed in one of  
37 three calf raising facilities. Samples were collected at three calf raising programs that received  
38 calves from multiple dairy farms. The first calf raising facility received calves from 7,000 of their  
39 own dairy cows raised at three nearby locations. These calves were housed in California-style  
40 hutches facing to the south on a gradual slope to facilitate drainage. In the winter the hutch  
41 tops were lowered and the bottoms boarded up to help protect the calves from the wind.  
42 Calves were watered and assessed three times per day and fed twice a day with heated milk

43 replacer. Calves were given colostrum at birth and a gallon per day for the next three days.  
44 Calves were vaccinated intranasally against IBR, PI3 and BRSV. *Salmonella typhimurium* bacterin  
45 was given at 5 and 12 days of age. Vaccination against *Moraxella bovis* was given at day 21 with  
46 clostridium Chauvoei-Septicum-Novyi-Sordelli-Perfringens Types C &D bacterin administered at  
47 day 28. Calves were weaned at 60 days of age.

48 The second NM calf raising facility was similar in that calves originated from 13,000 cows from 3  
49 dairies. These calves received a gallon of colostrum via esophageal tube and were intranasally  
50 vaccinated against IBR as well as PI3, with vitamin B12 and Penicillin administration upon  
51 arrival. Calves were housed in bungalow-style hutches made of wood that faced south on a  
52 slope and had a small wire panel yard attached to the hutch. Calves were watered twice a day  
53 and assessed once a day. Calves were fed a mixture of hospital milk and milk replacer. At 30  
54 days of age calves were vaccinated with a modified live culture of *Pasteurella haemolytica* and  
55 *Pasteurella multocida*, and at 45 and 70 days of age calves received a modified live vaccine for  
56 IBR, BVD types I and II, PI3 and BRSV. Calves were weaned at 70 days of age.

57 The third NM calf raising facility received calves from a single 3000 cow dairy. Calves were  
58 housed in plastic hutches, each with a wire yard attached to it. Hutches were not set on a slope  
59 and were oriented east during the summer months and south during the winter months. Calves  
60 were given 1 gallon of colostrum within the first hour of birth, and 2 quarts of colostrum were  
61 given the following morning and afternoon. Calves were fed and watered twice a day. Milk,  
62 consisting of pasteurized fresh milk and milk replacer, was heated and fed to the calves twice a  
63 day. Calf health was assessed twice a day. The vaccination protocol for this facility included an

64 intranasal modified live vaccine for IBR and PI3 the week the calves were received, a modified  
65 live vaccine for IBR, BVD types I & II, BRSV, PI3, *Mannheimia haemolytica* and *Pasteurella*  
66 *multocida* during weeks 2 and 6, *Moraxella bovis* bacterin vaccine at week 4, and clostridium  
67 Chauvoei-Septicum-Novyi-Sordelli-Perfringens Types C & D bacterin was administered at week  
68 7. Calves were weaned at 80 days of age.

69 The mean health scores of the control heifers in NM were  $1.7 \pm 0.9$ , and  $8.3 \pm 1.5$  for the cases.  
70 The mean health score for controls (that ultimately converted to cases) at the time of  
71 selection was  $1.6 \pm 1.2$ , as compared to mean scores of  $8.1 \pm 1.5$  after conversion and  
72 reclassification to case status. Mean health score for the CA and NM controls differed ( $P =$   
73  $0.001$ ), as did the mean health score for the cases ( $P < 0.0001$ ), which was due to higher scores  
74 in NM (**Supplementary Table 1**). The proportion of control calves that converted to cases was  
75 not different ( $P = 0.61$ ) between CA and NM. The mean age for calves diagnosed as a BRDC case  
76 was  $53.5 \pm 13.0$  days, which did not differ ( $P = 0.7$ ) from the mean age of the matched controls  
77 when sampled ( $53.1 \pm 11.6$  days). The mean age at which the calves were sampled was  
78 different between the California and New Mexico populations for both cases and controls ( $P <$   
79  $0.0001$ ).

80 The combined California and New Mexico population consisted of 2,763 Holstein calves; 1,505  
81 females and 1,258 males, which included 1,384 controls and 1,379 cases. The mean health  
82 score for controls and cases was  $1.3 \pm 0.9$  and  $7.1 \pm 1.6$ , respectively. The mean case and mean  
83 control health scores for the combined population differed from the California ( $P < 0.0001$ ) and  
84 the New Mexico ( $P < 0.0001$ ) populations. The mean age of the combined cases and controls  
85 differed ( $P = 0.01$ ) between the ages of the cases and controls in the combined population. The

86 mean age for the combined cases was  $48.3 \pm 10.4$  days and  $49.3 \pm 9.7$  for the combined  
87 controls.

## 88 Diagnostics

89 The two most common organisms detected in the cases were *Mycoplasma* spp. (64.6% in CA,  
90 57.4% in NM), and *Pasturella multocida* (36.3% in CA, 61% in NM). These two organisms were  
91 also the most frequently detected in the controls. *Mycoplasma* spp. was detected in 57.1% of  
92 controls in CA and 48.7% of controls in NM, whereas *Pasturella multocida* was detected in  
93 23.6% and 54.8% of controls in CA and NM, respectively. *Mycoplasma* spp. were the most  
94 common organism detected in the combined CA and NM population for both cases (62.6%) and  
95 controls (54.8%), followed by *Pasturella multocida*, with 43% of cases and 32% of controls  
96 identified as being diagnostically positive for this organism.

97 The proportions of the remaining pathogens detected in each population were dissimilar  
98 among cases and controls. All detected pathogens were found to be present as commensal  
99 organisms (at some level) among the controls, with the exception of bovine viral diarrhea virus  
100 and bovine herpes viruses 1 & 2, which were either not detected in the cases (bovine herpes  
101 virus) or were detected in only very few individuals (bovine viral diarrhea virus). The odds ratio,  
102 computed as the odds of BRDC given the presence of a pathogen in the combined CA and NM  
103 population, ranged from 1.4 for *Mycoplasma* spp., to 4.9 for *Histophilus somni*. The relatively  
104 small number of calves for which *H. somni* was detected may have resulted in an inflation of the  
105 odds ratio. The mean odds ratio for all seven detected pathogens was 2.5.

106 *Aerobic Bacteria and Mycoplasma Culture and qPCR*

107 For the CA samples, aerobic bacterial cultures were performed by plating the transport media  
108 (Brucella broth) from the mid nasal and deep pharyngeal swabs onto sheep blood agar and  
109 chocolate agar for 48 hours at 37°C. Initial typing of organisms was based on colony  
110 morphology, and subsequently confirmed with biochemical testing. *Mycoplasma* spp. were  
111 cultured in an enrichment broth for 48 hours, plated on modified Hayflick media, and grown in  
112 a CO<sub>2</sub> incubator at 37°C for 7 days. Mycoplasma species were identified based on colony  
113 morphology and confirmed with digitonin and Diene's Stain. Quantitative PCR for respiratory  
114 pathogens was set up to identify bovine herpes virus-1 (BHV-1) [82], BVDV [83], BRSV [84], and  
115 bovine coronavirus (unpublished data, Wisconsin Veterinary Diagnostic Laboratory, University  
116 of Wisconsin, Madison, WI 53706).

117 For the NM samples, deep pharyngeal swabs were placed in a 10% glycerol Brucella  
118 broth transport media and kept on ice and transported to the Bacteriology Section at  
119 Washington Animal Disease Diagnostic Laboratory. Swabs were used to inoculate the glycerol  
120 media in Columbia Blood Agar (CBA) plates and Columbia Selective Agar (CSA, selective medium  
121 used for the isolation of *Pasteurella*, *Mannheimia*, *Bibersteinia*, and *Histophilus* spp).  
122 Mycoplasma broth was also inoculated by pouring in the glycerol media. CBA, CSA and  
123 mycoplasma broth were incubated at 35 °C in CO<sub>2</sub>. CBA and CSA were observed for two days,  
124 growing colonies that phenotypically indicated the presence of members of the *Pasteurellaceae*  
125 family, *Streptococcus* spp with alpha haemolysis, *Trueperella pyogenes* and others. Non-

126 fermenter Gram-negative rods were isolating in CBA and MacConkey agar and incubated for 24  
127 - 48 hours at 35°C in CO<sub>2</sub>. Genus and specie identification was based on biochemical tests.

128           After 3 – 5 days of incubation the mycoplasma broth was sub-cultured in mycoplasma  
129 plates with a Dacron swab, and a digitonin disk was placed into the agar surface. Mycoplasma  
130 plates were incubated for 48 – 72 hours at 35°C in CO<sub>2</sub>. After incubation, the inhibition zone  
131 around the digitonin disk was measured and Diene’s stain was performed. If the inhibition zone  
132 was ≥ 15mm and the Diane’s stain showed the classical mycoplasma colony morphology, the  
133 microorganism was identified as *Mycoplasma* spp. The mycoplasma broth was sent to PCR for  
134 specie identification.

#### 135 Quality Assurance

136 For the EIGENSTRAT analyses, quality control filtering for the 2014 California calves for the  
137 EIGENSTRAT [72] analysis resulted in the removal of animals with a genotyping call rate < 95%  
138 (n=46). In addition, 5 animals were identified as Klinefelter XXY calves and 3 calves possessed a  
139 phenotypic gender that differed from that predicted by their genotypes, resulting in their  
140 removal from the study. The mean genotype call rate for the remaining 1,958 calves (1,225  
141 males and 733 females from the California population) was 99.3%. Of the 739 New Mexico  
142 calves, 2 calves were identified as putative Klinefelter calves and removed, and 2 were removed  
143 due to gender differences between their reported phenotypes and genotypes. Forty-seven  
144 animals were removed for possessing a genotype call rate less than 95% leaving 344 cases and  
145 348 controls with a mean genotype call rate of 99.4%. Quality control filtering of SNPs for the  
146 EIGENSTRAT analysis was performed individually for each population, and removed any SNPs

147 with minor allele frequency (MAF) < 0.01, a call rate < 0.9, or that deviated from Hardy-  
148 Weinberg equilibrium with a  $P < 1 \times 10^{-100}$ . After filtering, a total of 619,503 SNPs for the CA  
149 calves and 628,925 SNPs for the NM calves remained for association analysis.

150 Prior to performing EMMAX [21, 22] using a genomic relationship matrix (GRM) [23] and FvR  
151 [71] regression analyses, all dairy calf genotypes (CA + NM) and diagnostic data were combined  
152 into a single file for quality control analyses and filtering. Calves possessing an overall genotype  
153 call rate < 0.90 were removed. Thereafter, we filtered SNPs with MAF < 0.001, a call rate <  
154 0.85, and/or those that deviated from Hardy-Weinberg Equilibrium (Fisher's exact HWE  $P < 1 \times$   
155  $10^{-100}$ ). Calves with gender, birthdate, and/or other disparities were also removed. The  
156 potential for male gender disparities were initially predicted by X chromosome heterozygosity >  
157 0.02. Calves exhibiting overt evidence of Klinefelter's syndrome or technical problems, as  
158 evidenced by extensive X chromosome heterozygosity and high Y chromosome SNP call rates (>  
159 0.50), were subsequently removed. However, two NM calves originally recorded as males  
160 following field observations produced evidence for X chromosome heterozygosity > 0.02. While  
161 both calves produced Y chromosome genotypes, they possessed less X chromosome  
162 heterozygosity than 99.9% (n = 704) of all phenotypically unambiguous NM females (n = 705),  
163 suggesting that this result may be due to missassemblies of the X chromosome,  
164 expansions/duplications, or other unknown anomalies. We conducted EMMAX-GRM and FvR  
165 analyses treating these two calves alternately as both male and female for comparison. At the  
166 conclusion of our quality control analyses, 2,682 Holstein calves (n = 1,975 CA; n = 707 NM) and  
167 651,637 SNPs remained for BRDC case-control GWAA using EMMAX and FvR regression. The



168 final ratio of cases to controls was nearly 1:1 in both NM (n = 352 cases, n = 355 controls) and  
169 CA (n = 981 cases, n = 994 controls), which collectively included 1,246 males and 1,436 females.

170 To assess potential population stratification that may lead to spurious GWAS results, principal  
171 component analyses (PCA) (i.e., see **Supplementary Figures 1 and 2**), quantile-quantile (Q-Q)  
172 (**Supplementary Figure 3**) and probability-probability (P-P) (**Supplementary Figures 4 and 5**)  
173 plots were used. In addition, genomic inflation factors were calculated to evaluate population  
174 stratification in each of the individual and the combined populations. The PCA for EIGENSTRAT  
175 was conducted using a reduced number of SNPs (185,481 SNPs for California, 201,552 SNPs for  
176 New Mexico and 187,609 SNPs for the combined data sets) which were obtained using the LD  
177 pruning procedure implemented in PLINK [85]. This reduction in SNPs decreased the level of LD  
178 between SNPs and reduced the squared correlation between SNPs to  $r^2 < 0.75$ . The PCA and  
179 genomic inflation factors were computed using EIGENSOFT [72]. The Q-Q plots were created in  
180 R where the expected  $P$ -value (for each SNP) was compared to the observed  $P$ -value on a  $-\log_{10}$   
181 scale.

182 For the GBLUP analyses [70], quality control filtering of SNPs was also performed jointly for  
183 both the CA and NM populations. All SNPs with MAF  $< 0.001$ , with a call rate  $< 0.85$ , or that  
184 deviated from Hardy-Weinberg equilibrium with a statistic of  $\chi^2_1 > 100$  ( $P < 1.52 \times 10^{-23}$ ) were  
185 removed. These edits left a total of 654,044 SNPs for both the California and New Mexico  
186 calves. Animals were filtered if they possessed a genotype call rate  $< 0.90$ , had an mean  
187 autosomal heterozygosity  $> 0.40$ , or were detected to be putative Klinefelter calves via having a  
188 non-paX (pseudo-autosomal) chromosome heterozygosity  $> 0.03$  and a Y chromosome SNP

189 call rate > 0.50. These filters left a total of 2,703 animals of which 1,239 were male and 1,464  
190 were female. These filters resulted in a genotype dataset in which 0.55% of genotypes were  
191 missing values which were imputed using Beagle v3.3.2 [86].

## 192 Month/Seasonal Effects

193  
194 In addition to evaluating the effects of age, gender, and the proportion of males and females in  
195 the case-control groups, we also evaluated season and month to determine if either had an  
196 effect on the loci identified as being associated with BRDC susceptibility. As it is well known that  
197 the prevalence of BRDC is affected by season, the study was purposely designed to eliminate  
198 any seasonal effects by equally sampling cases and controls within each month/season. This  
199 eliminates the potential confounding effect of differences in prevalence. However, the loci  
200 identified as being associated with BRDC susceptibility may be altered if the pathogens that  
201 elicit BRDC differ by season or month. This was tested for with EIGENSTRAT where month or  
202 season was coded as a categorical covariate and then the top 2000 SNP markers were  
203 compared to the analyses which did not include month or season. When comparing the overlap  
204 of the top 2000 SNP in the EIGENSTRAT analysis that didn't include season and the analyses  
205 that did, the concordance of the SNPs was 95.7% for CA, 90.5% for NM and 97% for the  
206 combined population. The same comparison for month the animal was sampled demonstrated  
207 that 89.6% of the CA, 90.6% of the NM and 94.1% of the combined population SNPs were  
208 shared between the analyses.

209 The potential effect of season and month on the GWAA results was also directly evaluated  
210 within the EMMAX-GRM and FvR approaches. The inclusion of month and season within an  
211 additive EMMAX-GRM model produced results that were highly concordant with a model that  
212 included only sex and age. Specifically, 96%-99% of the top 2000 SNPs were shared when  
213 season or month was either included or excluded in the EMMAX-GRM analyses for the CA, NM  
214 and combined populations. Moreover, all of the same top 30 SNPs (**Supplementary Table 2**)  
215 were identified as being associated with BRDC susceptibility regardless of whether season or  
216 month were included or excluded in the EMMAX-GRM model for all study populations.  
217 Inclusion of month or season also did not impact the pseudo-heritability estimates for CA, NM,  
218 or the combined cohort. Similarly, inclusion of season or month also had little impact on the  
219 FvR results, with the same top 30 SNPs identified as being associated with BRDC susceptibility  
220 **Supplementary Table 4**. When the top 2000 SNPs identified by FvR were compared before and  
221 after inclusion of season, 96.9% of the SNPs were shared in CA, 98.9% were shared with NM,  
222 and 97.5% were shared in the combined population. When the top 2000 SNPs from models that  
223 included and excluded month were compared, 98.3% of the SNPs were shared in CA, 95.9%  
224 were shared in NM, and 99.6% were shared in the combined population.

225 There was also no effect ( $P > 0.05$ ) when month of sampling was included in the GBLUP  
226 analyses. However, when season was included in the GBLUP model, a nominally significant  
227 effect of season for CA was detected ( $P = 0.02$ ), with no similar effect observed for NM or the  
228 combined population ( $P > 0.05$ ). When further evaluated, the effect of season for CA was  
229 determined to be due to the difference in the mean age of animals across the seasons. In the  
230 summer in CA, the mean age of calves was 48.2 days, 48.4 days in the fall, and 40.6 days in the

231 winter. By including season in the GBLUP model, some of the age differences were removed,  
232 resulting in a significant result even though the effect was due to age. Therefore, the correct  
233 analytical model was to include age (and sex) in the additive model, but not an effect for season  
234 of sampling (**Supplementary Table 3**).

235

236 **Supplementary Table 1.** Distribution of pre-weaned Holstein calf health scores (McGuirk  
 237 2008).  
 238

| Health Score* | # of Animals Receiving Score*        |                                    |                       | Binary Phenotype |
|---------------|--------------------------------------|------------------------------------|-----------------------|------------------|
|               | California <sup>+</sup><br>n = 1,941 | New Mexico <sup>^</sup><br>n = 748 | Combined<br>n = 2,689 |                  |
| 0             | 216                                  | 34                                 | 250                   | Control          |
| 1             | 530                                  | 122                                | 652                   | Control          |
| 2             | 210                                  | 160                                | 370                   | Control          |
| 3             | 49                                   | 51                                 | 100                   | Control          |
| 4             | 6                                    | 5                                  | 11                    | Control          |
| 5             | 244                                  | 13                                 | 257                   | Case             |
| 6             | 264                                  | 27                                 | 291                   | Case             |
| 7             | 206                                  | 74                                 | 280                   | Case             |
| 8             | 126                                  | 86                                 | 212                   | Case             |
| 9             | 67                                   | 100                                | 167                   | Case             |
| 10            | 18                                   | 45                                 | 63                    | Case             |
| 11            | 3                                    | 26                                 | 29                    | Case             |
| 12            | 2                                    | 5                                  | 7                     | Case             |

239  
 240 \*0 represents no clinical symptoms of BRDC.  
 241 <sup>+</sup>Animals from California that converted from a control to a case (n = 73) are not included. ,  
 242 <sup>^</sup>Jersey calves (n = 18) were removed.  
 243

244

245 **Supplementary Table 2.** Top 30 ranked bovine SNPs by the EMMAX-GRM analyses of the  
 246 California, New Mexico and combined populations.  
 247

| Chromosome                                | Location (Mb) | P value for most significant SNP | Rank for 30 most significant SNPs* |
|-------------------------------------------|---------------|----------------------------------|------------------------------------|
| <b>California</b>                         |               |                                  |                                    |
| BTA15                                     | 30-31         | 2.95x10 <sup>-6</sup>            | 1                                  |
| BTA26                                     | 49-50         | 1.20x10 <sup>-5</sup>            | 2                                  |
| BTA23                                     | 3-4           | 1.62x10 <sup>-5</sup>            | 3-6,15                             |
| BTA18                                     | 0.8-0.9       | 2.67x10 <sup>-5</sup>            | 7-13, 17-23,25-28, 30              |
| BTA14                                     | 63-64         | 3.55x10 <sup>-5</sup>            | 14                                 |
| BTA14                                     | 10-11         | 3.80x10 <sup>-5</sup>            | 16                                 |
| BTA27                                     | 15-16         | 4.07x10 <sup>-5</sup>            | 24                                 |
| BTA4                                      | 4-5           | 4.68x10 <sup>-5</sup>            | 29                                 |
| <b>New Mexico</b>                         |               |                                  |                                    |
| BTA5                                      | 23-24         | 1.22x10 <sup>-5</sup>            | 1, 21, 22                          |
| BTA16                                     | 70-71         | 1.39x10 <sup>-5</sup>            | 2, 6, 8, 10-12, 14, 24, 28-30      |
| BTA13                                     | 67-68         | 2.27x10 <sup>-5</sup>            | 3                                  |
| BTA2                                      | 2-3           | 2.91x10 <sup>-5</sup>            | 4, 7, 15, 24, 28, 30               |
| BTA14                                     | 7-8           | 2.97x10 <sup>-5</sup>            | 5                                  |
| BTA18                                     | 63-64         | 3.88x10 <sup>-5</sup>            | 13                                 |
| BTA6                                      | 85-86         | 5.03x10 <sup>-5</sup>            | 19                                 |
| BTA24                                     | 9-10          | 5.16x10 <sup>-5</sup>            | 20                                 |
| BTA13                                     | 53-54         | 5.51x10 <sup>-5</sup>            | 23                                 |
| BTA4                                      | 64-65         | 6.04x10 <sup>-5</sup>            | 25-27                              |
| <b>California and New Mexico Combined</b> |               |                                  |                                    |
| BTA15                                     | 30-31         | 1.95x10 <sup>-5</sup>            | 1                                  |
| BTA11                                     | 80-81         | 2.45x10 <sup>-5</sup>            | 2                                  |
| BTA8                                      | 73-74         | 3.35x10 <sup>-5</sup>            | 3, 10-12, 15-19                    |
| BTA4                                      | 47-48         | 3.88x10 <sup>-5</sup>            | 4-9, 13, 14, 20-24, 27, 28         |
| BTA20                                     | 0-1           | 5.29x10 <sup>-5</sup>            | 25, 30                             |
| BTA17                                     | 16-17         | 5.37x10 <sup>-5</sup>            | 26                                 |
| BTA26                                     | 12-13         | 5.67x10 <sup>-5</sup>            | 29                                 |

248 \*Indicates the SNP with the ranking closest to 1. SNPs that are the highest ranked by an  
 249 individual method, are not necessarily the SNPs that are ranked highest across all analyses as  
 250 shown in **Tables 3-5.**

251

252 **Supplementary Table 3.** Top 30 ranked bovine SNPs for GBLUP analyses of California, New  
 253 Mexico and combined populations.  
 254

| <b>Chromosome</b>                         | <b>Location (Mb)</b> | <b>Proportion of variance explained<sup>^</sup></b> | <b>Rank of 30 most significant SNPs*</b> |
|-------------------------------------------|----------------------|-----------------------------------------------------|------------------------------------------|
| <b>California</b>                         |                      |                                                     |                                          |
| BTA15                                     | 30-31                | 0.13                                                | 1, 8, 25-28                              |
| BTA23                                     | 3-4                  | 0.13                                                | 2-6                                      |
| BTA14                                     | 63-64                | 0.12                                                | 7, 17, 29                                |
| BTA3                                      | 119-120              | 0.11                                                | 9, 18                                    |
| BTA29                                     | 35-36                | 0.11                                                | 10-16                                    |
| BTA4                                      | 47-48                | 0.11                                                | 19                                       |
| BTA6                                      | 42-43                | 0.11                                                | 20-22                                    |
| BTA18                                     | 46-47                | 0.11                                                | 23                                       |
| BTA2                                      | 45-46                | 0.10                                                | 29                                       |
| BTA22                                     | 50-51                | 0.10                                                | 30                                       |
| <b>New Mexico</b>                         |                      |                                                     |                                          |
| BTAX                                      | 61-62                | 0.08                                                | 1                                        |
| BTAX                                      | 142-143              | 0.07                                                | 2                                        |
| BTA16                                     | 70-71                | 0.07                                                | 3-5, 8-11                                |
| BTA13                                     | 67-68                | 0.07                                                | 6, 14                                    |
| BTAX                                      | 27-28                | 0.07                                                | 7, 26                                    |
| BTA2                                      | 6-7                  | 0.06                                                | 12                                       |
| BTAX                                      | 21-22                | 0.06                                                | 13, 15                                   |
| BTAX                                      | 26-27                | 0.06                                                | 16                                       |
| BTA13                                     | 56-57                | 0.06                                                | 19                                       |
| BTA13                                     | 53-54                | 0.06                                                | 20, 21, 24                               |
| BTA24                                     | 22-23                | 0.06                                                | 22                                       |
| BTA28                                     | 36-37                | 0.06                                                | 23                                       |
| BTA6                                      | 85-86                | 0.06                                                | 234                                      |
| BTAX                                      | 55-56                | 0.06                                                | 27, 29                                   |
| BTA16                                     | 64-65                | 0.06                                                | 28                                       |
| BTA12                                     | 77-78                | 0.06                                                | 30                                       |
| <b>California and New Mexico Combined</b> |                      |                                                     |                                          |
| BTA15                                     | 30-31                | 0.11                                                | 1                                        |
| BTA15                                     | 31-32                | 0.10                                                | 2                                        |
| BTA17                                     | 16-17                | 0.10                                                | 3                                        |
| BTA20 <sup>#</sup>                        | 0-1                  | 0.10                                                | 4, 12, 15, 20                            |
| BTA20 <sup>#</sup>                        | 0-1                  | 0.10                                                | 5 - 10, 13, 14, 16                       |
| BTA12                                     | 58-59                | 0.10                                                | 11, 21                                   |
| BTA17                                     | 17-18                | 0.10                                                | 17,18                                    |
| BTA4                                      | 47-48                | 0.10                                                | 19                                       |
| BTAX                                      | 16-17                | 0.10                                                | 22                                       |
| BTA29                                     | 35-36                | 0.10                                                | 28, 29                                   |
| BTA17                                     | 15-16                | 0.10                                                | 30                                       |

255 <sup>^</sup>Proportion of additive genetic variance explained by a window of 7 adjacent SNPs

256 \*Indicates the SNP with the ranking closest to 1. SNPs that are the highest ranked by an  
257 individual method, are not necessarily the SNPs that are ranked highest across all analyses as  
258 shown in **Tables 3-5**.  
259 #Loci are separated by 200 kb.



260 **Supplementary Table 4.** Top 30 ranked bovine SNPs resulting from the FvR analyses of  
 261 California, New Mexico and the combined populations.  
 262

| <b>Chromosome</b>                         | <b>Location (Mb)</b> | <b>P value for most significant SNP</b> | <b>Rank of 30 most significant SNPs*</b> |
|-------------------------------------------|----------------------|-----------------------------------------|------------------------------------------|
| <b>California</b>                         |                      |                                         |                                          |
| BTA15                                     | 30-31                | 3.74x10 <sup>-7</sup>                   | 1, 23                                    |
| BTA18                                     | 0-1                  | 3.55x10 <sup>-6</sup>                   | 2, 6, 8, 11-14, 16-18, 20-21, 25-28, 30  |
| BTA14                                     | 11-12                | 5.23x10 <sup>-6</sup>                   | 3                                        |
| BTA14                                     | 10-11                | 5.99x10 <sup>-6</sup>                   | 5                                        |
| BTA3                                      | 119-120              | 6.6x10 <sup>-6</sup>                    | 7                                        |
| BTA26                                     | 49-50                | 7.8x10 <sup>-6</sup>                    | 9                                        |
| BTA14                                     | 62-63                | 7.84x10 <sup>-6</sup>                   | 10                                       |
| BTA14                                     | 63-64                | 1.09x10 <sup>-5</sup>                   | 15                                       |
| BTA15                                     | 14-15                | 1.31x10 <sup>-5</sup>                   | 19                                       |
| BTA3                                      | 15-16                | 1.37x10 <sup>-5</sup>                   | 23                                       |
| BTA3                                      | 88-89                | 1.4x10 <sup>-5</sup>                    | 24                                       |
| BTA14                                     | 82-83                | 1.56x10 <sup>-5</sup>                   | 29                                       |
| <b>New Mexico</b>                         |                      |                                         |                                          |
| BTA16                                     | 70-71                | 2.8x10 <sup>-6</sup>                    | 1-3, 10-13, 17                           |
| BTA5                                      | 23-24                | 6.04x10 <sup>-6</sup>                   | 4, 8, 9,                                 |
| BTA6                                      | 87-88                | 6.56x10 <sup>-6</sup>                   | 5-7                                      |
| BTA8                                      | 63-64                | 1.64x10 <sup>-5</sup>                   | 14, 15, 21-29                            |
| BTA1                                      | 3-4                  | 2x10 <sup>-5</sup>                      | 16, 20                                   |
| BTA1                                      | 34-35                | 2.07x10 <sup>-5</sup>                   | 19                                       |
| BTA14                                     | 7-8                  | 2.28x10 <sup>-5</sup>                   | 30                                       |
| <b>California and New Mexico Combined</b> |                      |                                         |                                          |
| BTA8                                      | 73-74                | 5.17x10 <sup>-6</sup>                   | 1, 5-7, 10-14                            |
| BTA15                                     | 30-31                | 6.42x10 <sup>-6</sup>                   | 2                                        |
| BTA12                                     | 87-88                | 7.29x10 <sup>-6</sup>                   | 3                                        |
| BTA7                                      | 11-12                | 1.01x10 <sup>-5</sup>                   | 4                                        |
| BTA20                                     | 0-1                  | 1.32x10 <sup>-5</sup>                   | 9, 30                                    |
| BTA18                                     | 46-47                | 1.7x10 <sup>-5</sup>                    | 16                                       |
| BTA3                                      | 119-120              | 1.8x10 <sup>-5</sup>                    | 17, 21, 28, 29                           |
| BTA11                                     | 80-81                | 1.85x10 <sup>-5</sup>                   | 18                                       |
| BTA27                                     | 2-3                  | 1.95x10 <sup>-5</sup>                   | 19                                       |
| BTA19                                     | 9-10                 | 1.97x10 <sup>-5</sup>                   | 20                                       |
| BTA17                                     | 14-15                | 2.29x10 <sup>-5</sup>                   | 26                                       |
| BTA7                                      | 10-11                | 2.13x10 <sup>-5</sup>                   | 22, 24, 25, 27                           |

263 \*Indicates the SNP with the ranking closest to 1. SNPs that are the highest ranked by an  
 264 individual method, are not necessarily the SNPs that are ranked highest across all analyses as  
 265 shown in **Tables 3-5.**

266 **Supplementary Table 5.** Top 30 ranked bovine SNP for EIGENSTRAT analyses of California, New  
 267 Mexico and combined populations.  
 268

| Chromosome                                | Location Mb | P value for most significant SNP | Rank of 30 most significant SNPs* |
|-------------------------------------------|-------------|----------------------------------|-----------------------------------|
| <b>California</b>                         |             |                                  |                                   |
| BTA14                                     | 10-11       | 1.47x10 <sup>-6</sup>            | 1, 4, 7, 14, 15                   |
| BTA18                                     | 0-1         | 2.24x10 <sup>-6</sup>            | 2, 8-13, 16-22, 24-25, 29         |
| BTA15                                     | 14-15       | 4.28x10 <sup>-6</sup>            | 3                                 |
| BTA3                                      | 119-120     | 6.24x10 <sup>-6</sup>            | 5                                 |
| BTA14                                     | 63-64       | 6.47x10 <sup>-6</sup>            | 6, 27,28                          |
| BTA26                                     | 49-50       | 1.85x10 <sup>-5</sup>            | 23                                |
| BTA15                                     | 30-31       | 2.14x10 <sup>-5</sup>            | 30                                |
| <b>New Mexico</b>                         |             |                                  |                                   |
| BTA2                                      | 71-72       | 6.35x10 <sup>-6</sup>            | 1                                 |
| BTA4                                      | 64-65       | 6.98x10 <sup>-6</sup>            | 2-4, 18                           |
| BTA8                                      | 72-73       | 8.35x10 <sup>-6</sup>            | 5                                 |
| BTA14                                     | 7-8         | 1.08 x10 <sup>-5</sup>           | 6, 7, 27, 28, 30                  |
| BTA19                                     | 32-33       | 1.14x10 <sup>-5</sup>            | 8                                 |
| BTA16                                     | 70-71       | 1.42x10 <sup>-5</sup>            | 9, 23-26                          |
| BTA8                                      | 73-74       | 1.65x10 <sup>-5</sup>            | 10-13, 16, 17, 19-22              |
| BTA12                                     | 77-78       | 1.82x10 <sup>-5</sup>            | 14                                |
| BTA29                                     | 46          | 1.84x10 <sup>-5</sup>            | 15                                |
| BTA13                                     | 71-72       | 2.66x10 <sup>-5</sup>            | 29                                |
| <b>California and New Mexico Combined</b> |             |                                  |                                   |
| BTA19                                     | 9-10        | 5.82x10 <sup>-6</sup>            | 1                                 |
| BTA4                                      | 48-49       | 7.09x10 <sup>-6</sup>            | 2-8                               |
| BTA26                                     | 12-13       | 1.34x10 <sup>-5</sup>            | 9                                 |
| BTA11                                     | 80-81       | 1.39x10 <sup>-5</sup>            | 10                                |
| BTA15                                     | 30-31       | 1.75x10 <sup>-5</sup>            | 11                                |
| BTA14                                     | 62-63       | 1.79x10 <sup>-5</sup>            | 12                                |
| BTA8                                      | 73-74       | 2.59x10 <sup>-6</sup>            | 16-22                             |
| BTA4                                      | 6-7         | 3.48x10 <sup>-5</sup>            | 23                                |
| BTA15                                     | 82-83       | 3.67x10 <sup>-5</sup>            | 24                                |
| BTA15                                     | 31-32       | 4.04x10 <sup>-5</sup>            | 25                                |
| BTA18                                     | 55-56       | 4.09x10 <sup>-5</sup>            | 26, 29                            |
| BTA15                                     | 66-67       | 4.2x10 <sup>-5</sup>             | 27                                |
| BTA14                                     | 40-41       | 4.48x10 <sup>-5</sup>            | 28                                |
| BTA26                                     | 3-4         | 5x10 <sup>-5</sup>               | 30                                |

269 \*Indicates the SNP with the ranking closest to 1. SNPs that are the highest ranked by an  
 270 individual method, are not necessarily the SNPs that are ranked highest across all analyses as  
 271 shown in **Tables 3-5.**

272 **Supplementary Figure 1** The first four EIGENSTRAT principal component analyses plots  
273 showing the distribution of presumed half-siblings (based on the genomic relationship matrix)  
274 of ten sires with the most offspring within the California calf study population. Each sire's  
275 offspring are coded with a different color and tend to cluster together within the study  
276 population. In panel A., the first principal component (PC1) (plotted on the X axis) is compared  
277 against the second principal component (PC2)( on the Y axis). In panel B., PC1 is again plotted  
278 on the X axis but is now compared against the third principal component (PC3) on the Y axis.  
279 Principal component 2 (PC2) (on the X axis) is plotted against the third principal component  
280 (PC3)( on the Y axis) in panel C. In Panel D., PC1 (on the X axis) was plotted against principal  
281 component 4 (PC4) (on the Y axis). In panel E., PC2 (on the X axis) was compared to PC4 (on the  
282 Y axis). Finally, in panel F., PC1 was plotted (on the X axis) and compared to PC4 (on the Y axis).

283

284 **Supplementary Figure 2.** The first four EIGENSTRAT principal component analyses plots  
285 showing the distribution of presumed half-siblings (based on the genomic relationship matrix)  
286 of the ten sires with the most offspring within the New Mexico calf population. Each sire's  
287 offspring are coded with a different color and tend to cluster together within the study  
288 population. In panel A., the first principal component (PC1) (plotted on the X axis) is compared  
289 against the second principal component (PC2)( on the Y axis). In panel B., PC1 is again plotted  
290 on the X axis but is now compared against the third principal component (PC3) on the Y axis.  
291 Principal component 2 (PC2) (on the X axis) is plotted against the third principal component  
292 (PC3)( on the Y axis) in panel C. In Panel D., PC1 (on the X axis) was plotted against principal

293 component 4 (PC4) (on the Y axis). In panel E., PC2 (on the X axis) was compared to PC4 (on the  
294 Y axis). Finally, in panel F., PC1 was plotted (on the X axis) and compared to PC4 (on the Y axis).

295  
296 **Supplementary Figure 3.** EIGENSTRAT Q-Q plots: A. CA with correction of 100 principle  
297 components and age and sex included in the model, B. NM calves with correction of 5 principle  
298 components with only age included in the model, and C. the combined CA-NM population with  
299 correction of 80 principle components and sex and age included in the model. For each of the  
300 plots in panels A-C, the observed  $-\log_{10} P$ -value (on the Y axis) is plotted against the expected  $-\log_{10} P$ -  
301 value (on the X axis).

302  
303 **Supplementary Figure 4.** EMMAX-GRM P-P plots with age and sex in the model for: A.  
304 California, and B. NM. In panel C., sex, age and population of origin were included in the  
305 combined CA-NM population. For each of the plots in panels A-C, the observed  $-\log_{10} P$ -value  
306 (on the Y axis) is plotted against the expected  $-\log_{10} P$ -value (on the X axis).

307  
308 **Supplementary Figure 5.** FvR P-P plots with sex and age in the model for: A. California with  
309 correction for 53 principle components, and B. NM calves with correction of 9 principle  
310 components. In panel C. sex, age and population of origin were included in the combined CA-  
311 NM population which included correction of 91 principle components. . For each of the plots in  
312 panels A-C, the observed  $-\log_{10} P$ -value (on the Y axis) is plotted against the expected  $-\log_{10} P$ -  
313 value (on the X axis).

314

315 **Note on Supplemental Q-Q and P-P Plots:** The trend observed in the Q-Q and/or P-P plots whereby the  
316 expected  $-\log_{10} P$ -values are larger than the observed was determined to be an issue related to the  
317 Holstein breed and/or the samples utilized. Briefly, LD pruning prior to GWAA mitigates this trend,  
318 which has never been observed during any of our ongoing QTL GWAA for beef cattle (i.e., multiple  
319 breeds, thousands of samples) using the same methods employed in this study. Unfortunately, very few  
320 Q-Q / P-P plots exist in the literature for U.S. Holstein cattle, and because we genotyped and analyzed  $\geq$   
321 2,596 holstein calves, we are confident that this result will be replicated. Finally, the trend whereby the  
322 expected  $-\log_{10} P$ -values are larger than the observed  $-\log_{10} P$ -values is less noticeable when using a  
323 PCA-based approach to stratification control during a GWAA because, given the number of components  
324 used, these PCA methods are not as exhaustive at correcting for stratification, as is the genomic  
325 relationship matrix.

## References for Additional File

1. McGuirk SM: **Disease management of dairy calves and heifers.** *Vet Clin North Am Food Anim Pract* 2008, **24**:139-153.
2. Brower A, Homb KM, Bochsler P, Porter R, Woods K, Ubl S, Krueger D, Cigel F, Toohey-Kurth K: **Encephalitis in aborted bovine fetuses associated with Bovine herpesvirus 1 infection.** *J Vet Diagn Invest* 2008, **20**:297-303.
3. Mahlum CE, Haugerud S, Shivers JL, Rossow KD, Goyal SM, Collins JE, Faaberg KS: **Detection of bovine viral diarrhea virus by TaqMan reverse transcription polymerase chain reaction.** *J Vet Diagn Invest* 2002, **14**:120-125.
4. Letellier C, Boxus M, Rosar L, Toussaint JF, Walravens K, Roels S, Meyer G, Letesson JJ, Kerkhofs P: **Vaccination of calves using the BRSV nucleocapsid protein in a DNA prime–protein boost strategy stimulates cell-mediated immunity and protects the lungs against BRSV replication and pathology.** *Vaccine* 2008, **26**:4840-4848.
5. Kang HM, Sul JH, Service SK, Zaitlen NA, Kong SY, Freimer NB, Sabatti C, Eskin E: **Variance component model to account for sample structure in genome-wide association studies.** *Nat Genet* 2010, **42**:348-354.
6. Segura V, Vihjálmsón BJ, Platt A, Korte A, Seren Ü, Long Q, Nordborg M: **An efficient multi-locus mixed-model approach for genome-wide association studies in structured populations.** *Nat Genet* 2012, **44**:825–830.
7. VanRaden PM: **Efficient methods to compute genomic predictions.** *J Dairy Sci* 2008, **91**:4414-4423.
8. Pinedo PJ, Galvão KN, Seabury CM: **Innate immune gene variation and differential susceptibility to uterine diseases in Holstein cows.** *Theriogenology* 2013, **80**(4):384-390.
9. Purcell S, Neale B, Todd-Brown K, Thomas L, Ferreira MA, Bender D, Maller J, Sklar P, de Bakker PI, Daly MJ, Sham PC: **PLINK: a toolset for whole-genome association and population-based linkage analysis.** *Am J Hum Genet* 2007, **81**:559-575.
10. Price AL, Patterson NJ, Plenge RM, Weinblatt ME, Shadick NA, Reich D: **Principal components analysis corrects for stratification in genome-wide association studies.** *Nat Genet* 2006, **38**:904-909.
11. Taylor JF: **Implementation and accuracy of genomic selection.** *Aquaculture* 2014, **420-421**(Suppl 1):8-14.

12. Browning BL, Browning SR: **A unified approach to genotype imputation and haplotype phase inference for large data sets of trios and unrelated individuals.** *Am J Hum Genet* 2009, **84**:210-223.
