# Supplementary material for: Susceptibility loci revealed for bovine respiratory disease complex in pre-weaned holstein calves
Source: PubMed Central journal article supplement (PMC4445561; doi:10.1186/1471-2164-15-1164), 2014-12-22
Supplement: 12864_2014_7079_MOESM4_ESM.pdf [file 12864_2014_7079_MOESM4_ESM.pdf]

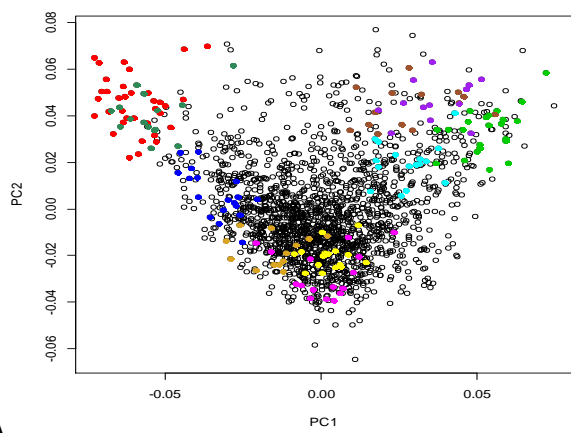

A

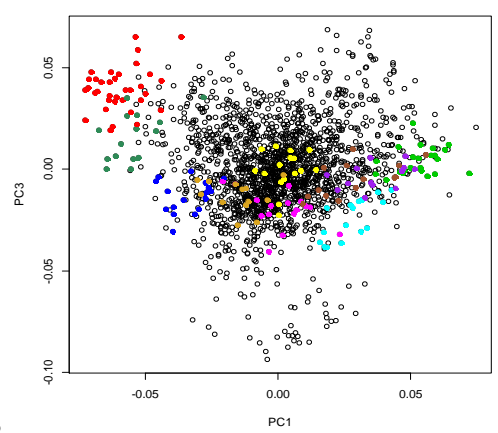

B.

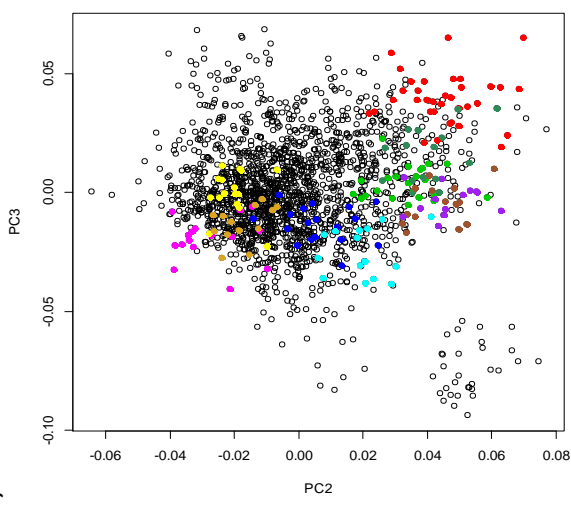

C

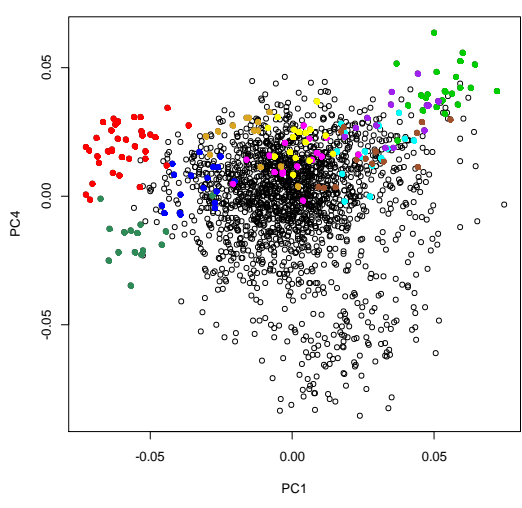

D.

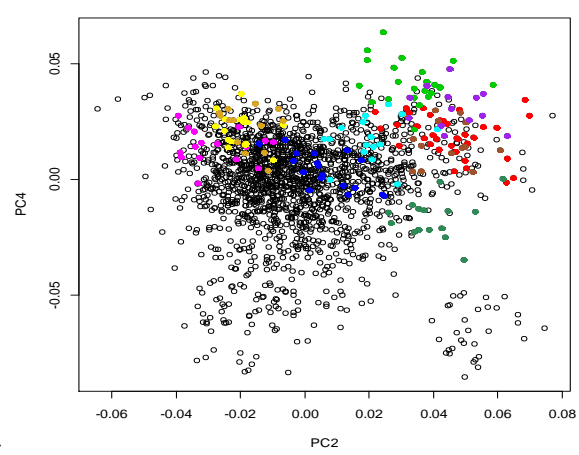

E.

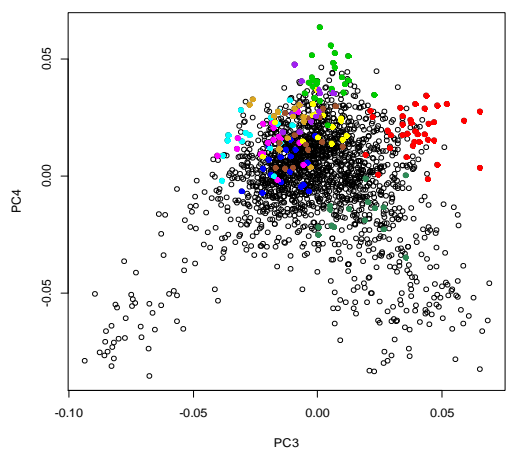

F.
